# Supplementary material for: Gender differences in medical errors among older patients and inequalities in medical compensation compared with younger adults
Source: Front Public Health. 2022 Sep 20;10:883822. doi: 10.3389/fpubh.2022.883822 (PMC9540365; doi:10.3389/fpubh.2022.883822)
Supplement: Supplementary file 1 [file Table_1.DOCX]

| Class 1 error | Class 2 error | Class 3 error | Code |
| --- | --- | --- | --- |
| Errors of Medical Administration | deficiency of certification | Excessive practice in medical institution | 1101 |
| Unqualified practice of staffs | 1102 |
| Deficiency of resources | Deficiency of medical post setting | 1201 |
| Deficiency of human resource arrangement | 1202 |
| Defects of medical item supply | 1203 |
| Institutional deficiency | Deficiency of important institution | 1301 |
| Breach of important institution | 1302 |
| Laissez-faire | 1303 |
| Errors of Medical process | misidentification | Errors in identification of patients | 2101 |
| Errors in identification of operation position | 2102 |
| Error in identification of similar items | 2103 |
| Post inaction | AWOL (Absent Without Leave) | 2201 |
| Unusual status on duty | 2202 |
| Idle in the performance of post duties | 2203 |
| Errors of delivery | Critical value not reported in time | 2301 |
| Ignore important inspection results | 2302 |
| Loss of vital inspection results | 2303 |
| Loss of vital specimens | 2304 |
| Error in transmission of oral order | 2305 |
| Errors of Medical technology | Diagnosis related | Misdiagnosis | 3101 |
| Delayed diagnosis | 3102 |
| Missed diagnosis | 3103 |
| Examination related | Error in manipulation of inspection | 3201 |
| Errors in data report | 3202 |
| Insufficient inspection | 3203 |
| Therapy related | Delay of timing during treatment | 3301 |
| Errors in treatment plan | 3302 |
| Errors in manipulation during treatment | 3303 |
| Improper transfer between hospitals or departments | 3304 |
| Improper observation during treatment | 3305 |
| Drug related | Off-label use | 3401 |
| Ignore contraindications | 3402 |
| Errors in prescription of drug name | 3403 |
| Wrong drug dosing | 3404 |
| Errors in route of drug | 3405 |
| Contraindication of drug compatibility | 3406 |
| Errors in drug dispensing | 3407 |
| Errors in drug enforcement | 3408 |
| Defects of drug technology | 3409 |
| Errors in use of drug entrust | 3410 |
| Transfusion related | Delayed transfusion | 3501 |
| Unnecessary blood transfusion | 3502 |
| Errors in blood type during transfusion | 3503 |
| Infection by blood transfusion | 3504 |
| Improper disposal of transfusion reaction | 3505 |
| Surgical operation related | Improper comprehension of surgical indication | 3601 |
| Poor judgment of surgical contraindications | 3602 |
| Improper selection of surgical program | 3603 |
| Inadequate preoperative preparation | 3604 |
| Improper timing of surgery | 3605 |
| Improper change of surgical protocol | 3606 |
| Failed to cure the protopathy | 3607 |
| Intraoperative damage of tissues and organs | 3608 |
| Complication of post operation | 3609 |
| Improper decision-making of surgical pathology | 3610 |
| Foreign body left in body after surgery | 3611 |
| Postoperative complications were not found in time | 3612 |
| Improper treatment of postoperative complications | 3613 |
| Missed important postoperative diagnosis | 3614 |
| Non-observation for patient before surgery | 3615 |
| Preoperative misdiagnosis of disease | 3616 |
| Anesthesia related | Errors in choice of narcotic drugs | 3701 |
| Errors in dosage of narcotic drugs | 3702 |
| Errors in manipulation during anesthesia | 3703 |
| Neglecting the patient's condition during anesthesia | 3704 |
| Neglecting the patient's condition during the recovery phase of anesthesia | 3705 |
| Improper handling of anesthesia | 3706 |
| Nosocomial infection | Defect of surgical hygiene | 3801 |
| Defect of disinfection and sterilization | 3802 |
| Infection during aseptic surgery | 3803 |
| Defect in disposal of clinical waste | 3804 |
| Irrational application of antibiotics | 3805 |
| Nursing related | Improper monitoring of the condition | 3901 |
| Error in order of handling and execution | 3902 |
| Improper handling of general nursing | 3903 |
| Errors in nursing during invasive manipulation | 3904 |
| Errors in life nursing | 3905 |
| Improper disposal of emergency | 3906 |
| Errors of Medical product | Apparatus related | Defect in qualification of medical device | 4101 |
| Abnormal source of medical device | 4102 |
| Necessary medical device missing/not working properly | 4103 |
| Unqualified quality of medical device | 4104 |
| Improper use of medical device | 4105 |
| Expiration of medical device | 4106 |
| Product quality label not retained | 4107 |
| Dosage related | Defect in qualification of drug | 4201 |
| Unlawful source of drug | 4202 |
| Expiration of drug | 4203 |
| Defect in quality of drug | 4204 |
| Improper storage of drug | 4205 |
| Errors of Medical environment | Hospital facilitates | Damage caused by defects of facility quality | 5101 |
| Human damage caused by defects of facility maintenance | 5102 |
| damage caused by improper use of facilities | 5103 |
| Food safety | Providing quality defective food causing damage | 5201 |
| Human damage caused by supply of improper food | 5202 |
| Safety guarantee | Personal injury caused by incomplete security obligations | 5301 |
| Loss of property caused by incomplete security obligations | 5302 |
| Errors of Medical humanity | Doctor-patient communication | Cold and rude attitude | 6101 |
| Misunderstanding caused by miscommunication | 6102 |
| Improper promise of healing | 6103 |
| Improper disparagement of medical colleagues | 6104 |
| Infringement of informed consent | Not informed of important condition information | 6201 |
| Insufficient implementation of informed consent obligations | 6202 |
| Insufficient implementation of informed consent obligations of invasive treatment | 6203 |
| The actual manipulation is inconsistent with the informed consent | 6204 |
| Infringement of privacy | Invasion of patient privacy during medical treatment | 6301 |
| Disclosure of patient privacy information | 6302 |
| Overtreatment | Unnecessary inspection items | 6401 |
| Apparently unnecessary treatment | 6402 |
| Errors of Medical document | Medical record writing | Malicious falsification and manipulation of medical records | 7101 |
| Not writing medical records in time | 7102 |
| Informal writing or modification of medical records | 7103 |
| Incomplete medical records | 7104 |
| Medical record storage | Malicious concealment and disposal of medical records | 7201 |
| Loss of medical records | 7202 |
| Refuse to copy the sealed medical records according to law | 7203 |
